# Supplementary material for: Lignin for Nano‐ and Microscaled Carrier Systems: Applications, Trends, and Challenges
Source: PubMed Central journal article supplement — ChemSusChem. 2019 May 10;12(10):2039–54. doi: 10.1002/cssc.201900480 (PMC6593669; doi:10.1002/cssc.201900480), 2019-05-10
Supplement: CSSC-12-2039-s001.pdf [file CSSC-12-2039-s001.pdf]

## **Author Contributions**

*M.H.S. Conceptualization: Lead; Project administration: Supporting; Resources: Equal; Supervision: Supporting; Visualization: Lead; Writing - Review & Editing: Lead*

*H.L. Conceptualization: Supporting; Data curation: Supporting; Methodology: Supporting*

*C.C. Conceptualization: Supporting; Methodology: Supporting; Writing - Review & Editing: Supporting*

*A.H. Data curation: Supporting; Writing - Review & Editing: Supporting*

*M.Ö. Conceptualization: Equal; Project administration: Supporting; Resources: Supporting; Supervision: Lead; Visualization: Supporting.*
